# Supplementary material
Source: PubMed Central journal article supplement (PMC2973901)
Supplement: 1010335107_pnas.201010335SI.pdf [file 1010335107_pnas.201010335SI.pdf]

# Supporting Information

Hautier et al. 10.1073/pnas.1010335107

**Table S1. Results of rank correlation analysis**

| Bradypus vs.               | All vertebrae       | Neural arches      | Centra             |
|----------------------------|---------------------|--------------------|--------------------|
| <i>Rhodomys</i> *          | -0.212 <sup>†</sup> | 0.319 <sup>‡</sup> | 0.898 <sup>‡</sup> |
| <i>Meriones</i> *          | 0.022               | 0.195              | 0.749 <sup>‡</sup> |
| <i>Cricetus</i> *          | -0.266 <sup>‡</sup> | 0.12               | 0.819 <sup>‡</sup> |
| Rodentia <sup>§</sup>      | -0.19 <sup>†</sup>  | 0.399 <sup>‡</sup> | 0.961 <sup>‡</sup> |
| <i>Mogera</i> *            | 0.279 <sup>‡</sup>  | 0.687 <sup>‡</sup> | 0.961 <sup>‡</sup> |
| <i>Cryptotis</i> *         | 0.279 <sup>‡</sup>  | 0.687 <sup>‡</sup> | 0.824 <sup>‡</sup> |
| Eulipotyphla <sup>§</sup>  | 0.279 <sup>‡</sup>  | 0.687 <sup>‡</sup> | 0.961 <sup>‡</sup> |
| Boreoeutheria <sup>§</sup> | 0.161               | 0.528 <sup>‡</sup> | 0.825 <sup>‡</sup> |

Comparisons of sequence rank between *Bradypus* and either individual placental species or composite taxa. Significance levels for hypothesized modules (neural arches or centra) were derived from a permutation test that generated a null distribution of rank correlations for 1,000 alternative partitions. The methodology used in this analysis is described in detail by Poe (1), Goswami (2), and Goswami et al. (3).

\*Individual placental species.

<sup>†</sup> $P < 0.05$ .

<sup>‡</sup> $P < 0.01$ .

<sup>§</sup>Composite taxa.

1. Poe S (2004) A test for patterns of modularity in sequences of developmental events. *Evolution* 58:1852–1855.
2. Goswami A (2007) Cranial modularity and sequence heterochrony in mammals. *Evol Dev* 9:290–298.
3. Goswami A, Weisbecker V, Sánchez-Villagra MR (2009) Developmental modularity and the marsupial-placental dichotomy. *J Exp Zool B Mol Dev Evol* 312B:186–195.

## Dataset S1. List of specimens (marsupials) and state of vertebral ossification

### [Dataset S1](#)

C, cervical; T, thoracic; L, lumbar; S, sacral; Cd, caudal; PND, postnatal day. Columns show the appearance of vertebral ossification centers. The circles represent the centra, and the crosses are the neural arches; the size of the symbols indicates the degree of ossification. Red color indicates that relative sizes of the neural arches and centra are unknown.

## Dataset S2. List of specimens (placentals) and state of vertebral ossification

### [Dataset S2](#)

C, cervical; T, thoracic; L, lumbar; S, sacral; Cd, caudal; PND, postnatal day. Columns show the appearance of vertebral ossification centers. The circles represent the centra, and the crosses are the neural arches; the size of the symbols indicates the degree of ossification. Red color indicates that relative sizes of the neural arches and centra are unknown. Data from *Meriones*, *Cricetus*, and *Rattus* derive from Yukawa et al. (1), Beyerlein et al. (2), and Strong (3).

1. Yukawa M, Hayashi N, Takagi K, Mochizuki K (1999) The normal development of Mongolian gerbil fetuses and, in particular, the timing and sequence of the appearance of ossification centres. *Anat Histol Embryol* 28:319–324.
2. Beyerlein L, Hillemann HH, Van Arsdell WC, 3rd (1951) Ossification and calcification from postnatal day eight to the adult condition in the golden hamster (*Cricetus auratus*). *Anat Rec* 111:49–65.
3. Strong RM (1925) The order, time, and rate of ossification of the albino rat (*Mus norvegicus albinus*) skeleton. *Am J Anat* 36:313–355.

## Dataset S3. List of specimens (armadillos) and state of vertebral ossification

### [Dataset S3](#)

C, cervical; T, thoracic; L, lumbar; S, sacral; Cd, caudal; PND, postnatal day. Columns show the appearance of vertebral ossification centers. The circles represent the centra, and the crosses are the neural arches; the size of the symbols indicates the degree of ossification. Red color indicates that relative sizes of the neural arches and centra are unknown.

## Dataset S4. List of specimens (sloths) and state of vertebral ossification

### [Dataset S4](#)

C, cervical; T, thoracic; L, lumbar; S, sacral; Cd, caudal; PND, postnatal day. Columns show the appearance of vertebral ossification centers. The circles represent the centra, and the crosses are the neural arches; the size of the symbols indicates the degree of ossification. Red color indicates that relative sizes of the neural arches and centra are unknown.
